# Supplementary material for: Identification and expression profile analysis of the SnRK2 gene family in cucumber
Source: PeerJ. 2022 Sep 21;10:e13994. doi: 10.7717/peerj.13994 (PMC9508882; doi:10.7717/peerj.13994)
Supplement: Supplemental Information 2 [file peerj-10-13994-s002.xlsx]

## Sheet: CT value
	3h						6H						12h						24h
	CK	T1	T2	T3	T4		CK	T1	T2	T3	T4		CK	T1	T2	T3	T4		CK	T1	T2	T3	T4
SnRK1	29.214	27.6969	28.1476	28.5231	28.1388		26.47	25.8126	25.6848	26.8493	27.233		26.4245	26.7014	26.5184	27.5159	27.2713		23.9752	27.5896	25.0103	27.1384	26.5771
SnRK1	28.3665	27.4514	28.511	28.5138	27.6579		26.2843	25.5516	24.8675	26.555	26.7417		26.5957	27.5731	26.5584	27.2571	27.5666		24.496	26.3201	25.0792	27.1488	26.2318
SnRK1	29.9901	28.1394	28.9404	28.3796	27.9049		26.1896	25.9314	25.3584	26.9834	26.8896		25.7187	26.4164	25.3756	27.0236	27.3475		24.4832	26.8703	25.4923	26.5646	26.417
SnRK2	27.0978	27.9529	28.0259	27.6672	27.4062		22.7758	25.9495	24.6889	24.9797	25.7777		21.727	24.5798	24.8699	25.4775	26.9596		24.1942	27.4947	27.3249	27.1344	28.6816
SnRK2	26.8565	27.9473	27.9668	27.9334	27.6027		22.6525	25.7877	24.7771	25.2372	25.6286		21.9207	24.468	25.0606	25.7094	26.1054		23.5408	27.9198	27.16	26.9878	28.7846
SnRK2	26.9013	27.9708	28.1643	27.6043	27.6902		22.7063	25.4968	23.9991	25.538	25.3044		22.2897	24.7439	25.1909	25.5176	26.4654		24.4167	27.8687	27.4349	27.162	28.83
SnRK3	27.4647	27.0474	27.1053	28.9066	28.0866		27.2374	28.1626	27.7265	28.1305	28.7658		25.7064	25.7748	26.1239	27.2907	28.0123		25.8725	27.8902	25.8822	26.7968	26.6616
SnRK3	27.904	27.0137	27.4018	28.8587	28.0501		27.1681	27.8267	27.8139	28.4737	28.8094		25.8273	25.6703	26.1139	27.3383	28.3371		25.9255	27.8647	26.2436	26.6721	26.5974
SnRK3	27.9779	26.6255	27.0742	28.4678	28.2545		27.152	27.9561	27.6987	28.5623	28.5566		26.2284	26.1877	26.2339	26.931	28.2422		25.9688	27.6859	25.9485	26.8287	26.6907
SnRK4	28.482	28.6043	28.9109	29.1377	29.2829		27.2609	28.0327	28.3334	27.7243	28.9608		26.668	25.9004	26.2319	26.9859	29.1111		27.1266	31.0655	29.0308	29.3437	29.543
SnRK4	29.2447	28.4832	28.8702	28.7886	29.0947		26.6085	28.0025	28.6463	27.5416	29.0812		26.543	25.7428	26.2785	26.8847	29.7149		26.7391	30.897	29.3856	29.9716	29.1458
SnRK4	29.2867	28.5425	28.9906	28.8736	29.4714		27.1982	27.9171	28.4962	27.6067	28.6922		26.6467	25.7001	26.3582	26.8174	29.3558		26.9541	31.3037	29.1539	30.1927	29.5302
SnRK5	29.0451	28.0983	32.518	30.2636	29.5702		31.3769	31.788	32.9003	33.4779	32.8157		30.3632	31.3632	29.9657	32.4332	32.5902		29.298	31.8881	32.2046	33.2598	32.2279
SnRK5	28.8451	28.9607	32.1767	30.4658	29.1346		30.7532	31.8696	33.2626	32.9147	31.8292		30.5809	31.0923	30.7657	32.0332	31.2298		30.6069	31.9488	30.8469	32.24	32.0279
SnRK5	28.9986	28.6651	32.7502	30.1554	28.9034		30.9027	31.8706	34.176	27.1728	31.0045		30.4982	31.1779	31.1951	31.565	31.6996		29.9568	31.9935	32.8402	32.9408	32.96
SnRK6	25.781	26.4611	25.8692	26.9675	25.5562		25.3559	27.4016	27.0013	27.0158	26.6959		24.3737	25.2322	25.7515	26.4204	26.3348		25.522	26.886	25.9335	26.9679	27.4375
SnRK6	25.7984	26.2702	26.0865	27.133	25.6885		25.1892	26.8844	26.8401	26.8849	26.9365		24.354	24.9743	25.6286	26.3717	26.5828		25.6645	27.1857	25.9337	27.005	27.1004
SnRK6	25.8454	27.4304	26.001	26.5804	25.8215		25.2554	27.2671	27.3322	26.9632	26.7338		24.5185	24.9394	25.8995	26.3512	26.2106		25.4885	26.9922	26.0809	27.1785	27.1113
SnRK7	27.2247	26.6683	25.7071	26.6249	26.4784		27.7512	28.9032	29.0701	28.7155	28.4666		27.0137	26.7724	27.1751	27.9777	27.9253		26.2377	27.5508	27.5508	26.8953	27.2216
SnRK7	27.344	26.3009	25.5869	26.8129	26.3974		27.6049	28.8416	29.5118	28.854	28.3105		27.0501	26.9255	27.1325	28.4182	28.192		25.5098	27.4449	27.4449	26.8916	26.9655
SnRK7	27.3162	26.3762	25.4281	27.102	26.3498		27.4997	29.1878	29.5517	28.9115	28.0209		27.282	26.89	27.4176	28.5664	28.8219		26.023	27.3648	27.3648	26.8931	27.0014
SnRK8	27.3659	26.5846	24.4415	27.6623	27.3053		27.403	28.664	28.3157	28.8191	28.5561		26.5647	29.1657	29.6805	29.8816	28.5229		27.3641	30.8993	29.1575	29.6503	29.3812
SnRK8	26.9954	26.6707	26.5142	27.2937	26.7813		27.3246	28.8411	28.144	28.7576	28.383		27.2436	29.2207	29.5089	30.6336	28.8215		27.3198	30.9234	29.4649	29.6995	29.4899
SnRK8	27.3823	26.7874	26.4181	27.602	27.3677		27.3462	28.5619	28.4812	28.8987	28.1921		27.1436	29.4769	29.5625	30.572	29.0267		27.1049	31.112	29.2512	29.73	29.2601
SnRK9	27.1916	27.1455	26.4695	27.8732	27.6329		27.5342	28.6895	27.785	27.8957	28.5192		25.8676	28.5431	28.6961	29.223	29.9336		26.992	30.5574	30.5503	30.6136	30.481
SnRK9	27.5334	26.9844	27.0576	28.1091	27.5866		27.6062	28.7828	28.4363	28.1728	29.1264		26.0759	28.1675	28.0833	29.0527	30.5939		27.1093	30.6937	30.6517	30.4167	30.2784
SnRK9	27.4369	27.0692	26.957	28.305	27.5644		27.3002	28.7186	27.8359	28.6316	27.1368		25.3754	28.2177	28.9679	29.0819	28.3804		25.3168	30.357	30.2109	30.9106	29.7676
SnRK10	29.3872	29.8777	29.2719	31.7067	29.2281		28.4458	30.3128	29.5034	30.6085	28.8836		27.3798	28.5728	28.8751	31.1556	30.2914		28.7974	32.5996	31.2092	31.4959	30.7553
SnRK10	29.1146	29.7696	29.1628	32.407	29.4296		27.9324	30.2963	30.3857	31.3598	28.3102		27.5798	28.5	28.7309	30.2332	31.1447		28.6595	32.0904	30.3196	31.9541	30.9417
SnRK10	28.7716	29.7879	28.6507	30.147	28.5388		28.4542	30.2451	29.9342	30.3674	28.6962		27.606	28.4047	28.3058	30.0663	31.2977		27.4595	31.3193	30.4384	31.3683	31.3611
SnRK11	31.4534	29.6573	30.9474	30.9262	29.4513		32.7924	31.6122	31.8405	31.4449	32.072		32.7827	31.8821	32.0887	32.7999	32.4461		31.4506	32.5835	31.4746	30.9339	32.9683
SnRK11	29.9525	29.2657	30.3306	30.2229	29.3769		31.1889	31.5374	30.1814	32.0726	33.8634		32.4055	31.8037	32.9075	30.8539	32.5251		31.7668	32.2234	32.0648	31.6778	33.236
SnRK11	29.6176	29.9658	30.1189	30.1234	29.6199		32.5907	31.5847	29.7662	31.7489	32.9109		31.853	31.9198	32.0637	31.0143	32.3438		30.7203	32.5596	30.4973	31.3444	33.2203
SnRK12	30.612	29.4782	30.3343	30.444	31.922		29.4155	30.2999	32.119	30.6677	30.8736		24.546	24.5431	24.2269	25.165	27.9651		31.4639	31.4067	31.2167	31.0723	31.0789
SnRK12	29.805	30.2912	29.6518	31.1127	29.805		31.7032	30.1369	32.6314	30.3347	30.946		24.3912	24.1958	23.823	25.823	28.023		30.1051	31.3956	32.0456	31.6824	31.188
SnRK12	30.2575	29.4085	30.7746	29.7815	30.6175		30.4303	30.2937	33.1485	31.1566	30.8393		24.4118	24.5426	24.6523	25.1224	28.0443		30.1366	31.3696	31.0696	30.884	31.0854
act	20.7527	21.3688	22.2042	22.1467	21.6171		21.5655	22.9236	23.3909	22.8032	22.9682		21.5375	20.9663	21.6954	22.4831	23.5787		20.7731	22.6357	20.9082	21.1339	22.9777
act	22.1701	21.3065	21.9981	21.2683	21.8915		21.6458	23.0038	23.2406	22.632	23.1144		21.5713	21.2789	21.6989	22.4186	23.4677		21.0082	22.5644	20.6024	21.2008	23.3141
act	21.9803	21.2855	22.261	22.2282	21.1825		21.5265	22.7587	23.2457	22.7236	23.168		21.6824	21.4395	21.2196	22.5125	23.7069		21.0816	22.5121	20.5006	20.9452	23.404

## Sheet: 3h
3h CT	CK					T1					T2					T3					T4
	Re1	Re2	Re3	Average		Re1	Re2	Re3	Average		Re1	Re2	Re3	Average		Re1	Re2	Re3	Average		Re1	Re2	Re3	Average
SnRK1	29.214	28.3665	29.9901	29.1902		27.6969	27.4514	28.1394	27.7626		28.1476	28.511	28.9404	28.533		28.5231	28.5138	28.3796	28.4722		28.1388	27.6579	27.9049	27.9005
SnRK2	27.0978	26.8565	26.9013	26.9519		27.9529	27.9473	27.9708	27.957		28.0259	27.9668	28.1643	28.0524		27.6672	27.9334	27.6043	27.735		27.4062	27.6027	27.6902	27.5664
SnRK3	27.4647	27.904	27.9779	27.7822		27.0474	27.0137	26.6255	26.8955		27.1053	27.4018	27.0742	27.1938		28.9066	28.8587	28.4678	28.7444		28.0866	28.0501	28.2545	28.1304
SnRK4	28.482	29.2447	29.2867	29.0045		28.6043	28.4832	28.5425	28.5434		28.9109	28.8702	28.9906	28.9239		29.1377	28.7886	28.8736	28.9333		29.2829	29.0947	29.4714	29.283
SnRK5	29.0451	28.8451	28.9986	28.963		28.0983	28.9607	28.6651	28.5747		32.518	32.1767	32.7502	32.4816		30.2636	30.4658	30.1554	30.2949		29.5702	29.1346	28.9034	29.2027
SnRK6	25.781	25.7984	25.8454	25.8083		26.4611	26.2702	27.4304	26.7206		25.8692	26.0865	26.001	25.9856		26.9675	27.133	26.5804	26.8937		25.5562	25.6885	25.8215	25.6887
SnRK7	27.2247	27.344	27.3162	27.2949		26.6683	26.3009	26.3762	26.4485		25.7071	25.5869	25.4281	25.574		26.6249	26.8129	27.102	26.8466		26.4784	26.3974	26.3498	26.4085
SnRK8	27.3659	26.9954	27.3823	27.2479		26.5846	26.6707	26.7874	26.6809		24.4415	26.5142	26.4181	25.7913		27.6623	27.2937	27.602	27.5193		27.3053	26.7813	27.3677	27.1515
SnRK9	27.1916	27.5334	27.4369	27.3873		27.1455	26.9844	27.0692	27.0664		26.4695	27.0576	26.957	26.828		27.8732	28.1091	28.305	28.0958		27.6329	27.5866	27.5644	27.5946
SnRK10	29.3872	29.1146	28.7716	29.0912		29.8777	29.7696	29.7879	29.8117		29.2719	29.1628	28.6507	29.0285		31.7067	32.407	30.147	31.4202		29.2281	29.4296	28.5388	29.0655
SnRK11	31.4534	29.9525	29.6176	30.3411		29.6573	29.2657	29.9658	29.6296		30.9474	30.3306	30.1189	30.4656		30.9262	30.2229	30.1234	30.4242		29.4513	29.3769	29.6199	29.4827
SnRK12	30.612	29.805	30.2575	30.2248		29.4782	30.2912	29.4085	29.726		30.3343	29.6518	30.7746	30.2535		30.444	31.1127	29.7815	30.4461		31.922	29.805	30.6175	30.7815
act	20.7527	22.1701	21.9803	21.6344		21.3688	21.3065	21.2855	21.3203		22.2042	21.9981	22.261	22.1544		22.1467	21.2683	22.2282	21.8811		21.6171	21.8915	21.1825	21.5637
∆CT	CK			Average	T1			T2			T3			T4
SnRK1	7.57958	6.73653	8.36008	7.55873	6.37687	6.13136	6.81944	5.99765	6.36096	6.79044	6.64309	6.63382	6.49963	6.57876	6.09794	6.34494
SnRK2	5.46785	5.22645	5.27129	5.32187	6.63285	6.62731	6.65083	5.87595	5.81681	6.01431	5.78717	6.05343	5.72433	5.84618	6.04274	6.13018
SnRK3	5.8347	6.27397	6.34793	6.1522	5.72738	5.69369	5.3055	4.95528	5.25177	4.92421	7.02662	6.97872	6.58779	6.52659	6.49008	6.69448
SnRK4	6.85203	7.61475	7.65675	7.37451	7.28429	7.16323	7.22253	6.76086	6.72019	6.84064	7.25769	6.90857	6.99356	7.72286	7.53473	7.91136
SnRK5	6.37514	6.17514	6.32862	6.29297	5.63834	6.50069	6.20511	9.00802	8.66666	9.24016	7.0236	7.22578	6.91543	6.60018	6.16463	5.93342
SnRK6	4.15101	4.16839	4.21543	4.17828	5.14108	4.9502	6.11043	3.71921	3.93655	3.85097	5.08751	5.25301	4.70043	3.99624	4.12847	4.26145
SnRK7	5.59467	5.714	5.68617	5.66495	5.34833	4.98089	5.05618	3.55705	3.43685	3.27809	4.74495	4.93289	5.22199	4.91836	4.83739	4.7898
SnRK8	5.73594	5.36543	5.75235	5.61791	5.21455	5.30069	5.41744	2.2915	4.36423	4.26808	5.78235	5.41372	5.72197	5.74533	5.2213	5.80772
SnRK9	4.52156	4.86343	4.76688	4.71729	4.68851	4.52736	4.61222	2.95951	3.54762	3.44696	4.63324	4.86905	5.06499	4.66289	4.61658	4.59442
SnRK10	6.71721	6.44464	6.1016	6.42115	7.41774	7.30959	7.32789	5.7619	5.65282	5.14066	8.46671	9.16696	6.90695	6.25805	6.45957	5.56881
SnRK11	8.78337	7.28249	6.94758	7.67115	7.19727	6.80567	7.50579	7.43741	6.82059	6.60892	7.6862	6.98292	6.88343	6.4813	6.40686	6.64986
SnRK12	7.94201	7.13501	7.58748	7.55483	7.01819	7.83124	6.9485	6.82426	6.14181	7.26455	7.20403	7.87274	6.54149	7.95201	6.83501	7.64748
-∆∆CT	CK			T1			T2			T3			T4
SnRK1	-0.0195816	0.823474	-0.800084	1.18313	1.42864	0.740558	1.56235	1.19904	0.769561	0.916908	0.926179	1.06037	0.981237	1.46206	1.21506
SnRK2	-0.147849	0.0935471	0.0487053	-1.31285	-1.30731	-1.33083	-0.555946	-0.496808	-0.694307	-0.46717	-0.733432	-0.404332	-0.526181	-0.722736	-0.810184
SnRK3	0.315299	-0.123973	-0.197932	0.422618	0.456307	0.844498	1.19472	0.898232	1.22579	-0.876616	-0.828715	-0.437793	-0.37659	-0.340081	-0.544477
SnRK4	0.517969	-0.244747	-0.286745	0.0857062	0.206769	0.14747	0.60914	0.649805	0.529363	0.11231	0.461426	0.376444	-0.352864	-0.164734	-0.541365
SnRK5	-0.0851443	0.114856	-0.0386153	0.651657	-0.210693	0.0848885	-2.71802	-2.37666	-2.95016	-0.7336	-0.93578	-0.625431	-0.310183	0.125374	0.356579
SnRK6	0.0289884	0.0116106	-0.0354304	-0.961077	-0.770203	-1.93043	0.460787	0.24345	0.329027	-0.907514	-1.07301	-0.520433	0.183755	0.0515299	-0.081452
SnRK7	0.0653296	-0.0540037	-0.0261736	0.311669	0.679112	0.603816	2.10295	2.22315	2.38191	0.915053	0.727111	0.438006	0.741639	0.822612	0.870198
SnRK8	-0.115942	0.254572	-0.132347	0.405447	0.319309	0.202564	3.3285	1.25577	1.35192	-0.16235	0.206284	-0.101971	-0.125334	0.3987	-0.187722
SnRK9	0.198441	-0.143432	-0.0468839	0.0714903	0.232635	0.147781	1.80049	1.21238	1.31304	0.126764	-0.109055	-0.304989	0.0971131	0.143422	0.165577
SnRK10	-0.297215	-0.0246431	0.318399	-0.997739	-0.889587	-0.907886	0.658102	0.767181	1.27934	-2.04671	-2.74696	-0.486952	0.161948	-0.0395673	0.851187
SnRK11	-1.11337	0.387514	0.72242	0.472726	0.864333	0.16421	0.232593	0.849411	1.06108	-0.0162047	0.687084	0.786568	1.1887	1.26314	1.02014
SnRK12	-0.392012	0.414988	-0.0374755	0.531807	-0.281242	0.601503	0.725737	1.40819	0.285447	0.345971	-0.322741	1.00851	-0.402012	0.714988	-0.0974755
2-∆∆CT	CK			T1			T2			T3			T4
SnRK1	0.986519	1.76966	0.574316	2.27068	2.69192	1.67082	2.95335	2.29587	1.70475	1.88806	1.90024	2.08546	1.97416	2.75502	2.3215
SnRK2	0.902595	1.06699	1.03434	0.402524	0.404073	0.397538	0.680211	0.708673	0.618006	0.723382	0.601472	0.755586	0.69439	0.605947	0.570309
SnRK3	1.24427	0.917657	0.871799	1.34036	1.37203	1.79564	2.289	1.86378	2.33884	0.544643	0.56303	0.738263	0.770256	0.789997	0.68564
SnRK4	1.43194	0.843964	0.819749	1.06121	1.1541	1.10763	1.52535	1.56896	1.44329	1.08096	1.3769	1.29814	0.783028	0.892093	0.68712
SnRK5	0.94269	1.08287	0.973589	1.57097	0.864122	1.06061	0.151982	0.192554	0.129394	0.601401	0.52276	0.648226	0.80654	1.09079	1.28039
SnRK6	1.0203	1.00808	0.975741	1.57097	0.864122	1.06061	0.151982	0.192554	0.129394	0.601401	0.52276	0.648226	0.80654	1.09079	1.28039
SnRK7	1.04632	0.963259	0.982021	1.24114	1.60115	1.51973	4.29586	4.6691	5.21228	1.88564	1.65532	1.35473	1.67207	1.7686	1.82791
SnRK8	0.92278	1.19298	0.912346	1.3245	1.24773	1.15074	10.0456	2.38795	2.55252	0.893569	1.15371	0.931759	0.916792	1.31832	0.877991
SnRK9	1.14746	0.905363	0.968025	1.0508	1.17498	1.10786	3.48338	2.31719	2.48465	1.09184	0.927195	0.809448	1.06963	1.10452	1.12161
SnRK10	0.813822	0.983064	1.24695	0.500784	0.539769	0.532966	1.578	1.70194	2.42728	0.242036	0.148965	0.713531	1.1188	0.972947	1.80399
SnRK11	0.462213	1.30814	1.64995	1.38773	1.8205	1.12055	1.17495	1.80176	2.0865	0.988831	1.61003	1.72497	2.27948	2.40017	2.02812
SnRK12	0.762066	1.33329	0.974358	1.44574	0.822882	1.5173	1.65375	2.65403	1.21879	1.27101	0.799549	2.01183	0.756802	1.64147	0.934667

## Sheet: 6h
6H CT	CK					T1					T2					T3					T4
	Re1	Re2	Re3	Average		Re1	Re2	Re3	Average		Re1	Re2	Re3	Average		Re1	Re2	Re3	Average		Re1	Re2	Re3	Average
SnRK1	26.47	26.2843	26.1896	26.3146		25.8126	25.5516	25.9314	25.7652		25.6848	24.8675	25.3584	25.3036		26.8493	26.555	26.9834	26.7959		27.233	26.7417	26.8896	26.9548
SnRK2	22.7758	22.6525	22.7063	22.7115		25.9495	25.7877	25.4968	25.7447		24.6889	24.7771	23.9991	24.4883		24.9797	25.2372	25.538	25.2516		25.7777	25.6286	25.3044	25.5702
SnRK3	27.2374	27.1681	27.152	27.1859		28.1626	27.8267	27.9561	27.9818		27.7265	27.8139	27.6987	27.7463		28.1305	28.4737	28.5623	28.3889		28.7658	28.8094	28.5566	28.7106
SnRK4	27.2609	26.6085	27.1982	27.0225		28.0327	28.0025	27.9171	27.9841		28.3334	28.6463	28.4962	28.492		27.7243	27.5416	27.6067	27.6242		28.9608	29.0812	28.6922	28.9114
SnRK5	31.3769	30.7532	30.9027	31.0109		31.788	31.8696	31.8706	31.8427		32.9003	33.2626	34.176	33.4463		33.4779	32.9147	27.1728	31.1885		32.8157	31.8292	31.0045	31.8831
SnRK6	25.3559	25.1892	25.2554	25.2668		27.4016	26.8844	27.2671	27.1844		27.0013	26.8401	27.3322	27.0579		27.0158	26.8849	26.9632	26.9547		26.6959	26.9365	26.7338	26.7887
SnRK7	27.7512	27.6049	27.4997	27.6186		28.9032	28.8416	29.1878	28.9776		29.0701	29.5118	29.5517	29.3779		28.7155	28.854	28.9115	28.827		28.4666	28.3105	28.0209	28.266
SnRK8	27.403	27.3246	27.3462	27.3579		28.664	28.8411	28.5619	28.689		28.3157	28.144	28.4812	28.3136		28.8191	28.7576	28.8987	28.8251		28.5561	28.383	28.1921	28.3771
SnRK9	27.5342	27.6062	27.3002	27.4802		28.6895	28.7828	28.7186	28.7303		27.785	28.4363	27.8359	28.0191		27.8957	28.1728	28.6316	28.2334		28.5192	29.1264	27.1368	28.2608
SnRK10	28.4458	27.9324	28.4542	28.2775		30.3128	30.2963	30.2451	30.2848		29.5034	30.3857	29.9342	29.9411		30.6085	31.3598	30.3674	30.7786		28.8836	28.3102	28.6962	28.63
SnRK11	32.7924	31.1889	32.5907	32.1907		31.6122	31.5374	31.5847	31.5781		31.8405	30.1814	29.7662	30.596		31.4449	32.0726	31.7489	31.7555		32.072	33.8634	32.9109	32.9488
SnRK12	29.4155	31.7032	30.4303	30.5163		30.2999	30.1369	30.2937	30.2435		32.119	32.6314	33.1485	32.633		30.6677	30.3347	31.1566	30.7197		30.8736	30.946	30.8393	30.8863
act	21.5655	21.6458	21.5265	21.5792		22.9236	23.0038	22.7587	22.8954		23.3909	23.2406	23.2457	23.2924		22.8032	22.632	22.7236	22.7196		22.9682	23.1144	23.168	23.0835
∆CT	CK			Average	T1			T2			T3			T4
SnRK1	4.88999	4.70434	4.60958	4.73464	2.91256	2.65158	3.03142	2.39484	1.57749	2.06835	4.12932	3.83502	4.26342	4.15304	3.66168	3.80962
SnRK2	1.19579	1.07246	1.12633	1.13153	3.04951	2.88773	2.59675	1.39886	1.48707	0.709086	2.25971	2.51721	2.818	2.69766	2.54859	2.22445
SnRK3	5.65744	5.58814	5.57199	5.60586	5.2626	4.92669	5.05608	4.43648	4.52389	4.40866	5.4105	5.75375	5.84231	5.68584	5.72941	5.47664
SnRK4	5.68088	5.02852	5.61823	5.44254	5.13274	5.10246	5.01714	5.04336	5.35627	5.20622	5.00425	4.82161	4.88672	5.88084	6.00118	5.61221
SnRK5	9.18687	8.56325	8.71267	8.82093	8.17801	8.25963	8.26057	9.13033	9.49258	10.406	10.0279	9.46466	8.7228	9.51574	8.52918	7.7045
SnRK6	3.77592	3.60916	3.67542	3.68683	4.50156	3.98438	4.36711	3.71131	3.55011	4.04215	4.29585	4.16491	4.24322	3.61588	3.85645	3.65378
SnRK7	6.17121	6.02493	5.91968	6.0386	6.00321	5.94161	6.28783	5.78007	6.22182	6.26174	5.99551	6.13398	6.19147	5.38658	5.23054	4.94093
SnRK8	5.82302	5.7446	5.76622	5.77795	5.764	5.94107	5.66187	5.02567	4.85403	5.19122	6.09915	6.03757	6.17868	5.47605	5.30299	5.11214
SnRK9	5.34417	5.41616	5.11019	5.29017	5.07945	5.17279	5.10865	4.01498	4.66632	4.06593	4.44571	4.72285	5.18157	5.21923	5.8264	3.83683
SnRK10	6.25585	5.74243	6.26422	6.0875	6.70283	6.68634	6.6351	5.73336	6.61572	6.16419	7.15849	7.90981	6.91742	5.58363	5.01019	5.39617
SnRK11	10.6024	9.99892	10.4007	10.334	8.00218	7.92745	7.97466	7.07046	6.41141	5.99619	7.99494	8.62261	8.29894	8.77197	10.5634	9.61092
SnRK12	7.22555	9.51323	8.24027	8.32635	6.68993	6.52688	6.68365	7.34903	7.86142	8.37851	7.21772	6.88474	7.70656	7.57364	7.64605	7.53927
-∆∆CT	CK			T1			T2			T3			T4
SnRK1	-0.159988	0.025662	0.120417	1.81744	2.07842	1.69858	2.33516	3.15251	2.66165	0.600681	0.894981	0.466581	0.57696	1.06832	0.92038
SnRK2	-0.0657893	0.0575399	0.00367256	-1.91951	-1.75773	-1.46675	-0.268862	-0.357073	0.420914	-1.12971	-1.38721	-1.688	-1.56766	-1.41859	-1.09445
SnRK3	-0.0474363	0.0218558	0.0380091	0.347397	0.683306	0.553919	1.17352	1.08611	1.20134	0.199499	-0.143749	-0.232311	-0.0758367	-0.119412	0.133363
SnRK4	-0.240876	0.411481	-0.178225	0.307259	0.337541	0.422861	0.39664	0.0837266	0.233783	0.435745	0.618393	0.553278	-0.440842	-0.561181	-0.172213
SnRK5	-0.366867	0.256752	0.107328	0.811992	0.730367	0.729433	-0.140326	-0.502577	-1.41598	-1.03791	-0.474661	0.2672	-0.525742	0.460818	1.2855
SnRK6	-0.0859246	0.0808425	0.0145774	-0.811564	-0.294377	-0.677111	-0.0213103	0.139893	-0.352153	-0.605848	-0.474907	-0.553223	0.0741248	-0.166453	0.0362239
SnRK7	-0.131207	0.0150748	0.120322	0.0367869	0.0983862	-0.247825	0.25993	-0.18182	-0.221737	0.0444906	-0.0939753	-0.151472	0.653418	0.809463	1.09907
SnRK8	-0.0430228	0.0353979	0.0137838	0.016	-0.161066	0.118129	0.75433	0.925972	0.588778	-0.319145	-0.257572	-0.398682	0.303949	0.477014	0.667858
SnRK9	-0.0541721	-0.126155	0.17981	0.210547	0.117205	0.181351	1.27502	0.623679	1.22407	0.844294	0.56715	0.108425	0.0707682	-0.536402	1.45317
SnRK10	-0.165848	0.347572	-0.174216	-0.612833	-0.596344	-0.545103	0.356635	-0.525717	-0.0741869	-1.06849	-1.81981	-0.827424	0.506367	1.07981	0.693827
SnRK11	-0.60237	0.00108093	-0.400679	1.99782	2.07255	2.02534	2.92954	3.58859	4.00381	2.00506	1.37739	1.70106	1.22803	-0.563438	0.389085
SnRK12	1.10445	-1.18323	0.0897346	1.64007	1.80312	1.64635	0.98097	0.468584	-0.0485062	1.11228	1.44526	0.623441	0.756364	0.683951	0.790728
2-∆∆CT	CK			T1			T2			T3			T4
SnRK1	0.895033	1.01795	1.08705	3.52455	4.22344	3.24582	5.04605	8.89203	6.32754	1.51643	1.85958	1.38183	1.4917	2.09699	1.89261
SnRK2	0.955422	1.04069	1.00255	0.264344	0.295713	0.361795	0.829974	0.780747	1.33878	0.457009	0.382303	0.310356	0.337356	0.374078	0.468316
SnRK3	0.967654	1.01526	1.0267	1.27226	1.60581	1.46807	2.25562	2.12301	2.29953	1.1483	0.905164	0.85127	0.948792	0.920563	1.09685
SnRK4	0.846232	1.33005	0.88379	1.23735	1.2636	1.34058	1.31644	1.05975	1.17591	1.35261	1.53516	1.46742	0.736704	0.677747	0.88748
SnRK5	0.775465	1.19479	1.07723	1.75563	1.65906	1.65799	0.907314	0.705845	0.374755	0.487032	0.719636	1.20347	0.694602	1.37632	2.43766
SnRK6	0.942181	1.05764	1.01016	0.569764	0.815425	0.625416	0.985337	1.10182	0.783414	0.657085	0.719513	0.681496	1.05272	0.891031	1.02543
SnRK7	0.913067	1.0105	1.08698	1.02583	1.07058	0.842165	1.19742	0.88159	0.857532	1.03132	0.936937	0.900331	1.57289	1.75256	2.14216
SnRK8	0.970619	1.02484	1.0096	1.01115	0.894364	1.08533	1.68685	1.89996	1.50397	0.801545	0.836494	0.758551	1.23452	1.39186	1.58871
SnRK9	0.963147	0.91627	1.13273	1.15713	1.08463	1.13395	2.42003	1.5408	2.33605	1.79539	1.48159	1.07805	1.05028	0.689488	2.73809
SnRK10	0.891404	1.27242	0.886249	0.653911	0.661428	0.685342	1.28044	0.694614	0.949877	0.476818	0.283258	0.563535	1.42047	2.11376	1.61757
SnRK11	0.658671	1.00075	0.757502	3.99396	4.20631	4.07087	7.61868	12.0302	16.0423	4.01405	2.59797	3.25139	2.34246	0.676688	1.30956
SnRK12	2.15018	0.440365	1.06417	3.1168	3.48973	3.13041	1.97379	1.38375	0.966937	2.16188	2.72312	1.54055	1.68923	1.60653	1.72995

## Sheet: 12h
12H CT	CK					T1					T2					T3					T4
	Re1	Re2	Re3	Average		Re1	Re2	Re3	Average		Re1	Re2	Re3	Average		Re1	Re2	Re3	Average		Re1	Re2	Re3	Average
SnRK1	26.4245	26.5957	25.7187	26.2463		26.7014	27.5731	26.4164	26.8969		26.5184	26.5584	25.3756	26.1508		27.5159	27.2571	27.0236	27.2655		27.2713	27.5666	27.3475	27.3951
SnRK2	21.727	21.9207	22.2897	21.9792		24.5798	24.468	24.7439	24.5972		24.8699	25.0606	25.1909	25.0404		25.4775	25.7094	25.5176	25.5682		26.9596	26.1054	26.4654	26.5101
SnRK3	25.7064	25.8273	26.2284	25.9207		25.7748	25.6703	26.1877	25.8776		26.1239	26.1139	26.2339	26.1572		27.2907	27.3383	26.931	27.1867		28.0123	28.3371	28.2422	28.1972
SnRK4	26.668	26.543	26.6467	26.6192		25.9004	25.7428	25.7001	25.7811		26.2319	26.2785	26.3582	26.2895		26.9859	26.8847	26.8174	26.896		29.1111	29.7149	29.3558	29.3939
SnRK5	30.3632	30.5809	30.4982	30.4808		31.3632	31.0923	31.1779	31.2111		29.9657	30.7657	31.1951	30.6422		32.4332	32.0332	31.565	32.0105		32.5902	31.2298	31.6996	31.8399
SnRK6	24.3737	24.354	24.5185	24.4154		25.2322	24.9743	24.9394	25.0486		25.7515	25.6286	25.8995	25.7599		26.4204	26.3717	26.3512	26.3811		26.3348	26.5828	26.2106	26.376
SnRK7	27.0137	27.0501	27.282	27.1153		26.7724	26.9255	26.89	26.8626		27.1751	27.1325	27.4176	27.2417		27.9777	28.4182	28.5664	28.3208		27.9253	28.192	28.8219	28.3131
SnRK8	26.5647	27.2436	27.1436	26.984		29.1657	29.2207	29.4769	29.2877		29.6805	29.5089	29.5625	29.5839		29.8816	30.6336	30.572	30.3624		28.5229	28.8215	29.0267	28.7903
SnRK9	25.8676	26.0759	25.3754	25.773		28.5431	28.1675	28.2177	28.3094		28.6961	28.0833	28.9679	28.5824		29.223	29.0527	29.0819	29.1192		29.9336	30.5939	28.3804	29.636
SnRK10	27.3798	27.5798	27.606	27.5219		28.5728	28.5	28.4047	28.4925		28.8751	28.7309	28.3058	28.6373		31.1556	30.2332	30.0663	30.4851		30.2914	31.1447	31.2977	30.9113
SnRK11	32.7827	32.4055	31.853	32.3471		31.8821	31.8037	31.9198	31.8685		32.0887	32.9075	32.0637	32.3533		32.7999	30.8539	31.0143	31.556		32.4461	32.5251	32.3438	32.4383
SnRK12	24.546	24.3912	24.4118	24.4496		24.5431	24.1958	24.5426	24.4271		24.2269	23.823	24.6523	24.2341		25.165	25.823	25.1224	25.3701		27.9651	28.023	28.0443	28.0108
act	21.5375	21.5713	21.6824	21.5971		20.9663	21.2789	21.4395	21.2282		21.6954	21.6989	21.2196	21.538		22.4831	22.4186	22.5125	22.4714		23.5787	23.4677	23.7069	23.5844
∆CT	CK			Average	T1			T2			T3			T4
SnRK1	4.82449	4.99568	4.11872	4.6463	5.47136	6.34307	5.1864	4.97842	5.01839	3.83556	5.04586	4.7871	4.55361	3.69131	3.98662	3.76752
SnRK2	0.127037	0.320731	0.689692	0.379153	3.34984	3.23799	3.5139	3.32986	3.52061	3.65088	3.00754	3.23942	3.04757	3.37957	2.52539	2.88536
SnRK3	4.10639	4.22728	4.62837	4.32068	4.5448	4.44028	4.95767	4.58393	4.57394	4.69387	4.82074	4.86835	4.46095	4.43234	4.75714	4.66224
SnRK4	5.06799	4.94295	5.04669	5.01921	4.67036	4.51275	4.47005	4.69185	4.73854	4.81818	4.51591	4.41468	4.34738	5.53106	6.13492	5.77583
SnRK5	7.87318	8.09094	8.00824	7.99079	7.76318	7.4923	7.57791	7.37568	8.17568	8.6051	8.07322	7.67322	7.20502	6.04024	4.67976	5.14962
SnRK6	2.77375	2.75397	2.91854	2.81542	4.00219	3.7443	3.70944	4.21153	4.08861	4.35947	3.95036	3.90169	3.88119	2.75479	3.00275	2.63056
SnRK7	5.41375	5.45012	5.68197	5.51528	5.54236	5.6955	5.66002	5.63512	5.59253	5.87756	5.50771	5.94822	6.09636	4.34528	4.61199	5.24193
SnRK8	4.9647	5.64364	5.54355	5.38396	7.93571	7.99065	8.24687	8.14048	7.96885	8.02247	7.41158	8.16357	8.10204	4.94291	5.24147	5.44666
SnRK9	3.37764	3.58589	2.88536	3.28296	4.9431	4.5675	4.61774	6.10608	5.49326	6.37791	4.86305	4.69274	4.72191	3.38363	4.04391	1.83036
SnRK10	4.88983	5.08985	5.116	5.03189	4.97282	4.9	4.80467	6.28509	6.14087	5.7158	6.79557	5.87324	5.70635	3.74144	4.59473	4.74766
SnRK11	10.2927	9.91549	9.36305	9.85709	8.28208	8.20372	8.3198	9.49868	10.3175	9.47371	8.43985	6.49391	6.65427	5.89606	5.97506	5.79382
SnRK12	2.05598	1.90117	1.92178	1.95965	0.943052	0.595759	0.942619	1.63695	1.23298	2.06226	0.804978	1.46298	0.762362	1.31506	1.37298	1.39426
-∆∆CT	CK			T1			T2			T3			T4
SnRK1	-0.174494	-0.345676	0.531281	-0.821361	-1.69307	-0.536405	-0.328423	-0.368392	0.814437	-0.395862	-0.137101	0.0963851	0.958691	0.663384	0.882477
SnRK2	0.252963	0.0592694	-0.309692	-2.96984	-2.85799	-3.1339	-2.94986	-3.14061	-3.27088	-2.62754	-2.85942	-2.66757	-2.99957	-2.14539	-2.50536
SnRK3	0.213613	0.0927161	-0.308367	-0.224796	-0.120277	-0.63767	-0.263934	-0.25394	-0.373867	-0.500743	-0.548348	-0.140954	-0.112341	-0.437141	-0.342237
SnRK4	-0.0479878	0.0770484	-0.0266885	0.349636	0.507248	0.549946	0.328149	0.28146	0.201825	0.504089	0.605323	0.672617	-0.511057	-1.11492	-0.755827
SnRK5	0.116822	-0.10094	-0.0182395	0.226822	0.4977	0.41209	0.614317	-0.185683	-0.615105	-0.0832222	0.316778	0.784978	1.94976	3.31024	2.84038
SnRK6	0.0462531	0.0660266	-0.0985413	-1.18219	-0.9243	-0.88944	-1.39153	-1.26861	-1.53947	-1.13036	-1.08169	-1.06119	0.0652122	-0.182751	0.189439
SnRK7	0.106252	0.0698844	-0.161973	-0.0223637	-0.175499	-0.140023	-0.115123	-0.0725264	-0.357562	0.0122874	-0.428217	-0.576364	1.17472	0.908006	0.27807
SnRK8	0.415301	-0.263637	-0.163553	-2.55571	-2.61065	-2.86687	-2.76048	-2.58885	-2.64247	-2.03158	-2.78357	-2.72204	0.437089	0.138526	-0.0666571
SnRK9	-0.0976434	-0.305886	0.39464	-1.6531	-1.2775	-1.32774	-2.81608	-2.20326	-3.08791	-1.57305	-1.40274	-1.43191	-0.0936262	-0.753906	1.45964
SnRK10	0.140169	-0.0598473	-0.0859952	0.0571812	0.13	0.225327	-1.25509	-1.11087	-0.685798	-1.76557	-0.843236	-0.676347	1.28856	0.435268	0.282335
SnRK11	-0.432726	-0.0554871	0.496952	1.57792	1.65628	1.5402	0.361324	-0.457467	0.386287	1.42015	3.36609	3.20573	3.96394	3.88494	4.06618
SnRK12	-0.0959785	0.0588257	0.0382168	1.01695	1.36424	1.01738	0.32305	0.727017	-0.102262	1.15502	0.497017	1.19764	0.644941	0.587017	0.565738
2-∆∆CT	CK			T1			T2			T3			T4
SnRK1	0.886078	0.786939	1.44521	0.565908	0.309268	0.689487	0.796407	0.774646	1.75861	0.760035	0.909345	1.06909	1.94355	1.58379	1.84354
SnRK2	1.19165	1.04194	0.806814	0.127641	0.13793	0.11392	0.129421	0.113392	0.103602	0.161819	0.137794	0.157392	0.125037	0.226034	0.176121
SnRK3	1.15959	1.06638	0.807555	0.855716	0.920011	0.64275	0.832814	0.838603	0.771711	0.706743	0.683803	0.906919	0.925086	0.738597	0.788817
SnRK4	0.967284	1.05486	0.981671	1.27424	1.42134	1.46403	1.2554	1.21542	1.15015	1.41823	1.52132	1.59396	0.701708	0.461716	0.592207
SnRK5	1.08434	0.932425	0.987437	1.17025	1.41196	1.33061	1.53083	0.879233	0.652883	0.943947	1.24555	1.72307	3.8631	9.9193	7.16211
SnRK6	1.03258	1.04683	0.933977	0.440682	0.526936	0.539824	0.38116	0.41506	0.344011	0.456802	0.472475	0.479236	1.04624	0.881021	1.14032
SnRK7	1.07643	1.04963	0.893802	0.984618	0.885461	0.907505	0.923303	0.950971	0.780482	1.00855	0.74318	0.670652	2.25749	1.87645	1.21257
SnRK8	1.33358	0.832985	0.892824	0.17008	0.163725	0.137084	0.147575	0.166218	0.160154	0.244587	0.145232	0.15156	1.35387	1.10078	0.954848
SnRK9	0.934558	0.808945	1.31461	0.317956	0.412509	0.398392	0.141995	0.217147	0.117611	0.336098	0.378211	0.37064	0.937164	0.592996	2.7504
SnRK10	1.10203	0.959366	0.942134	1.04043	1.09429	1.16904	0.418966	0.463016	0.621662	0.29411	0.557392	0.625748	2.44284	1.35216	1.21616
SnRK11	0.74086	0.96227	1.41123	2.98539	3.15203	2.90834	1.2846	0.728264	1.30703	2.67613	10.3109	9.22613	15.605	14.7735	16.7511
SnRK12	0.935637	1.04162	1.02684	2.02363	2.57441	2.02424	1.25097	1.65521	0.931571	2.22688	1.41129	2.29364	1.56368	1.50214	1.48014

## Sheet: 24h
24h CT	CK					T1					T2					T3					T4
	Re1	Re2	Re3	Average		Re1	Re2	Re3	Average		Re1	Re2	Re3	Average		Re1	Re2	Re3	Average		Re1	Re2	Re3	Average
SnRK1	23.9752	24.496	24.4832	24.3181		27.5896	26.3201	26.8703	26.9267		25.0103	25.0792	25.4923	25.1939		27.1384	27.1488	26.5646	26.9506		26.5771	26.2318	26.417	26.4086
SnRK2	24.1942	23.5408	24.4167	24.0506		27.4947	27.9198	27.8687	27.7611		27.3249	27.16	27.4349	27.3066		27.1344	26.9878	27.162	27.0947		28.6816	28.7846	28.83	28.7654
SnRK3	25.8725	25.9255	25.9688	25.9223		27.8902	27.8647	27.6859	27.8136		25.8822	26.2436	25.9485	26.0247		26.7968	26.6721	26.8287	26.7659		26.6616	26.5974	26.6907	26.6499
SnRK4	27.1266	26.7391	26.9541	26.94		31.0655	30.897	31.3037	31.0887		29.0308	29.3856	29.1539	29.1901		29.3437	29.9716	30.1927	29.836		29.543	29.1458	29.5302	29.4063
SnRK5	29.298	30.6069	29.9568	29.9539		31.8881	31.9488	31.9935	31.9434		32.2046	30.8469	32.8402	31.9639		33.2598	32.24	32.9408	32.8136		32.2279	32.0279	32.96	32.4053
SnRK6	25.522	25.6645	25.4885	25.5583		26.886	27.1857	26.9922	27.0213		25.9335	25.9337	26.0809	25.9827		26.9679	27.005	27.1785	27.0505		27.4375	27.1004	27.1113	27.2164
SnRK7	26.2377	25.5098	26.023	25.9235		27.5508	27.4449	27.3648	27.4535		27.5508	27.4449	27.3648	27.4535		26.8953	26.8916	26.8931	26.8933		27.2216	26.9655	27.0014	27.0628
SnRK8	27.3641	27.3198	27.1049	27.2629		30.8993	30.9234	31.112	30.9783		29.1575	29.4649	29.2512	29.2912		29.6503	29.6995	29.73	29.6933		29.3812	29.4899	29.2601	29.377
SnRK9	26.992	27.1093	25.3168	26.4727		30.5574	30.6937	30.357	30.536		30.5503	30.6517	30.2109	30.471		30.6136	30.4167	30.9106	30.647		30.481	30.2784	29.7676	30.1757
SnRK10	28.7974	28.6595	27.4595	28.3055		32.5996	32.0904	31.3193	32.0031		31.2092	30.3196	30.4384	30.6557		31.4959	31.9541	31.3683	31.6061		30.7553	30.9417	31.3611	31.0194
SnRK11	31.4506	31.7668	30.7203	31.3126		32.5835	32.2234	32.5596	32.4555		31.4746	32.0648	30.4973	31.3456		30.9339	31.6778	31.3444	31.3187		32.9683	33.236	33.2203	33.1415
SnRK12	31.4639	30.1051	30.1366	30.5685		31.4067	31.3956	31.3696	31.3906		31.2167	32.0456	31.0696	31.444		31.0723	31.6824	30.884	31.2129		31.0789	31.188	31.0854	31.1174
act	20.7731	21.0082	21.0816	20.9543		22.6357	22.5644	22.5121	22.5707		20.9082	20.6024	20.5006	20.6704		21.1339	21.2008	20.9452	21.0933		22.9777	23.3141	23.404	23.2319
∆CT	CK			Average	T1			T2			T3			T4
SnRK1	3.02522	3.54598	3.53319	3.36813	5.59963	4.33013	4.88031	4.26028	4.32921	4.74226	5.4284	5.4388	4.85464	3.2171	2.87176	3.057
SnRK2	3.24422	2.59084	3.46673	3.1006	5.50468	5.92978	5.87873	6.57491	6.40999	6.68488	5.42437	5.27779	5.45195	5.3216	5.42462	5.46997
SnRK3	4.92247	4.97553	5.01875	4.97225	5.90024	5.87468	5.6959	5.13217	5.49361	5.19845	5.08678	4.9621	5.1187	3.30161	3.23736	3.33069
SnRK4	6.17665	5.78914	6.00414	5.98998	9.07548	8.90701	9.31371	8.28084	8.6356	8.40391	7.63371	8.26157	8.48273	6.18296	5.78582	6.17023
SnRK5	5.71199	5.82925	4.0368	5.19268	8.08806	8.14883	8.19345	9.36456	8.00686	10.0002	9.13982	8.12003	8.8208	7.2279	7.0279	7.96003
SnRK6	4.57195	4.71454	4.53845	4.60831	4.89604	5.19574	5.00223	5.18345	5.18372	5.33088	5.25794	5.29501	5.46847	4.07754	3.74035	3.75127
SnRK7	5.28773	4.55982	5.07297	4.97351	5.56076	5.45488	5.37476	6.80076	6.69488	6.61476	5.18535	5.18159	5.18306	3.86161	3.60549	3.64136
SnRK8	6.41408	6.36975	6.15486	6.3129	8.90935	8.9334	9.12204	8.40749	8.71494	8.50116	7.94033	7.98951	8.02001	6.02115	6.1299	5.90007
SnRK9	8.01796	9.32693	8.67678	8.67389	6.75739	6.89371	6.55697	7.71031	7.81175	7.37089	6.49365	6.29667	6.79063	5.481	5.27844	4.7676
SnRK10	7.51743	7.37951	6.17951	7.02548	8.79962	8.2904	7.51932	8.36918	7.47961	7.59837	7.37594	7.83415	7.24832	5.75525	5.94171	6.36114
SnRK11	10.1706	10.4868	9.44034	10.0326	8.78347	8.42335	8.75958	8.63458	9.22483	7.65725	6.81386	7.55777	7.22444	7.96828	8.23595	8.22027
SnRK12	10.1839	8.82507	8.85656	9.28851	7.60669	7.5956	7.56962	8.37669	9.2056	8.22962	6.9523	7.56236	6.76401	6.07893	6.188	6.08535
-∆∆CT	CK			T1			T2			T3			T4
SnRK1	0.34478	-0.175981	-0.163192	-2.22963	-0.960131	-1.51031	-0.890277	-0.959212	-1.37226	-2.0584	-2.0688	-1.48464	0.152901	0.498236	0.313002
SnRK2	-0.14422	0.50916	-0.366735	-2.40468	-2.82978	-2.77873	-3.47491	-3.30999	-3.58488	-2.32437	-2.17779	-2.35195	-2.2216	-2.32462	-2.36997
SnRK3	0.0475253	-0.00553139	-0.0487538	-0.93024	-0.904681	-0.725902	-0.162174	-0.523608	-0.22845	-0.116782	0.00790184	-0.148701	1.66839	1.73264	1.63931
SnRK4	-0.18665	0.200857	-0.0141435	2.08548	1.91701	2.32371	1.29084	1.6456	1.41391	0.64371	1.27157	1.49273	-0.807041	-1.20418	-0.819772
SnRK5	-0.521987	-0.639251	1.1532	0.581938	0.521174	0.476548	-0.694563	0.663135	-1.33023	-0.469819	0.549968	-0.1508	1.4421	1.6421	0.709974
SnRK6	0.0380483	-0.104537	0.071549	-0.286036	-0.585741	-0.392226	-0.573453	-0.573718	-0.720883	-0.647943	-0.685007	-0.858473	0.532462	0.869649	0.858731
SnRK7	-0.317732	0.410179	-0.10297	-0.59076	-0.484876	-0.404756	-1.83076	-1.72488	-1.64476	-0.215348	-0.211594	-0.213059	1.10839	1.36451	1.32864
SnRK8	-0.10408	-0.0597517	0.155136	-2.59935	-2.6234	-2.81204	-2.09749	-2.40494	-2.19116	-1.63033	-1.67951	-1.71001	0.288847	0.180101	0.409927
SnRK9	0.652042	-0.65693	-0.00677948	-1.56739	-1.70371	-1.36697	-2.52031	-2.62175	-2.18089	-1.30365	-1.10667	-1.60063	-0.291005	-0.0884386	0.422399
SnRK10	-0.48743	-0.349512	0.850488	-1.76962	-1.2604	-0.489319	-1.33918	-0.449607	-0.56837	-0.345945	-0.804145	-0.21832	1.27475	1.08829	0.668859
SnRK11	-0.140602	-0.456783	0.589657	1.24653	1.60665	1.27042	1.39542	0.805165	2.37275	3.21614	2.47223	2.80556	2.06172	1.79405	1.80973
SnRK12	-0.150343	-0.893911	0.464932	1.78331	1.7944	1.82038	1.01331	0.184397	1.16038	2.4377	1.82764	2.62599	3.31107	3.202	3.30465
2-∆∆CT	CK			T1			T2			T3			T4
SnRK1	1.26996	0.885165	0.893047	0.213213	0.51401	0.351035	0.539511	0.514338	0.386286	0.240083	0.238358	0.357337	1.1118	1.41249	1.24229
SnRK2	0.904869	1.42322	0.775536	0.188851	0.140654	0.14572	0.0899387	0.100831	0.0833382	0.199661	0.221013	0.195881	0.214403	0.199627	0.19345
SnRK3	1.03349	0.996173	0.966771	0.524771	0.534151	0.604619	0.893678	0.69563	0.853551	0.922243	1.00549	0.902062	3.1786	3.32335	3.11517
SnRK4	0.878644	1.14938	0.990244	4.24416	3.7764	5.0062	2.4467	3.12879	2.66459	1.56234	2.41424	2.8142	0.571553	0.434015	0.566531
SnRK5	0.696412	0.642046	2.22407	1.49686	1.43512	1.39141	0.617896	1.58352	0.397706	0.722055	1.46405	0.900751	2.71716	3.1212	1.63577
SnRK6	1.02672	0.930103	1.05084	0.820152	0.666307	0.761953	0.672007	0.671883	0.606726	0.63819	0.622003	0.551536	1.4464	1.82722	1.81344
SnRK7	0.80233	1.32885	0.931114	0.663993	0.714559	0.755364	0.281116	0.302525	0.319801	0.861339	0.863583	0.862706	2.15604	2.57489	2.51165
SnRK8	0.930398	0.959429	1.11353	0.165013	0.162285	0.142394	0.233665	0.188818	0.218975	0.323015	0.312189	0.305659	1.22166	1.13296	1.32862
SnRK9	1.57139	0.634227	0.995312	0.337417	0.306996	0.387704	0.174305	0.162471	0.22054	0.405101	0.464365	0.329733	0.817333	0.94054	1.34015
SnRK10	0.713295	0.78485	1.80311	0.293286	0.417428	0.712361	0.395245	0.732242	0.674378	0.786792	0.572701	0.859566	2.41956	2.12622	1.58981
SnRK11	0.907141	0.728609	1.50489	2.3727	3.04544	2.41232	2.63065	1.74735	5.17926	9.29297	5.54899	6.99131	4.17482	3.46787	3.50577
SnRK12	0.901036	0.538153	1.38025	3.44214	3.4687	3.53174	2.01853	1.13634	2.23516	5.41778	3.54956	6.17307	9.92504	9.20232	9.88093

## Sheet: T1-T4
T1	CK	SE	3H	SE		6H	SE		12H	SE		24H	SE
SnRK2.1	1.0414	0.03697	2.2111	0.29627	*	3.6646	0.29077	**	0.5216	0.11198	*	0.3594	0.08693	**
SnRK2.2	1.0122	0.06982	0.4014	0.00197	**	0.3073	0.02872	**	0.1265	0.00695	**	0.1584	0.01529	**
SnRK2.3	1.0061	0.05296	1.5027	0.14677	*	1.4487	0.09677	*	0.8062	0.08379		0.5545	0.0252	**
SnRK2.4	1.0148	0.05136	1.1076	0.02682		1.2805	0.03237		1.3865	0.07101		4.3423	0.03059
SnRK2.5	1.0545	0.18089	1.1652	0.0544		1.6909	0.02138	*	1.3043	0.02945		1.4411	0.04706
SnRK2.6	1.021	0.03873	0.4541	0.09815	**	0.6702	0.07437	*	0.5025	0.03112	**	0.7495	0.04485	*
SnRK2.7	1.0332	0.0994	1.454	0.109	*	0.9795	0.06988		0.9259	0.03006		0.7113	0.02643	*
SnRK2.8	1.0077	0.18441	1.241	0.05027		0.9969	0.05558		0.157	0.01011	**	0.1566	0.00713	**
SnRK2.9	1.0457	0.10594	1.11121	0.0544		1.1252	0.02138		0.3763	0.02945	**	0.344	0.02353	**
SnRK2.10	1.0029	0.00534	0.5245	0.01202	**	0.6669	0.01641	**	1.1013	0.06459	*	0.4744	0.21526	**
SnRK2.11	1.007	0.04072	1.4429	0.35322		4.0904	0.10751	**	3.0153	0.12456	**	2.6102	0.37749	**
SnRK2.12	1.008	0.01675	1.262	0.22051		3.2456	0.21149	**	2.2074	0.31781	**	3.4951	0.04602	*
T2	CK	SE	3H	SE		6H	SE		12H	SE		24H	SE
SnRK2.1	1.0414	0.03697	2.318	0.36061	*	6.7552	1.13064	**	1.1099	0.32442		0.48	0.04744	**
SnRK2.2	1.0122	0.06982	0.669	0.02677	*	0.9832	0.17837		0.1155	0.00753	**	0.0914	0.0051	**
SnRK2.3	1.0061	0.05296	2.1639	0.15073	**	2.2261	0.05306	**	0.8144	0.0214	**	0.8143	0.06045
SnRK2.4	1.0148	0.05136	1.5125	0.03684	**	1.184	0.07421		1.207	0.03067	*	2.7467	0.20113	**
SnRK2.5	1.0545	0.18089	0.158	0.01848	**	0.6626	0.15525		1.021	0.26317		0.8664	0.36416
SnRK2.6	1.021	0.03873	2.7467	0.20113	*	0.9569	0.09301		0.3801	0.02052	**	0.6502	0.02174	**
SnRK2.7	1.0332	0.0994	4.7257	0.26606	**	0.9788	0.10951		0.8849	0.05283		0.3011	0.01119	**
SnRK2.8	1.0077	0.18441	4.9954	0.62558		1.6969	0.11442	*	0.158	0.00549	**	0.2138	0.0132	*
SnRK2.9	1.0457	0.10594	2.7617	0.36404	*	2.099	0.28013	*	0.1589	0.02995	**	0.1858	0.01772	**
SnRK2.10	1.0029	0.00534	1.9024	0.26486	*	0.975	0.16958		0.5012	0.06155	**	0.6006	0.10404	*
SnRK2.11	1.007	0.04072	1.6877	0.26925		11.8971	1.4326	*	1.1066	0.18929		3.1858	1.02885
SnRK2.12	1.008	0.01675	1.8422	0.4249		1.4415	0.29208		1.2793	0.20938		1.7967	0.33604
T3	CK	SE	3H	SE		6H	SE		12H	SE		24H	SE
SnRK2.1	1.0414	0.03697	1.9579	0.06387	**	1.5859	0.14223	*	0.9128	0.08923		0.2786	0.03938	**
SnRK2.2	1.0122	0.06982	0.6935	0.04693	*	0.3832	0.04234	**	0.1523	0.00738	**	0.2055	0.00782	**
SnRK2.3	1.0061	0.05296	0.6153	0.0617	**	0.9682	0.09136		0.7658	0.07086		0.9433	0.03165
SnRK2.4	1.0148	0.05136	1.252	0.08849		1.4517	0.05328	**	1.5112	0.05098	**	2.2636	0.36915	*
SnRK2.5	1.0545	0.18089	0.5908	0.03661		0.8034	0.21101		1.3042	0.22682		1.029	0.22358
SnRK2.6	1.021	0.03873	0.5685	0.06644	**	0.686	0.01816	**	0.4695	0.00664	**	0.6039	0.0266	**
SnRK2.7	1.0332	0.0994	1.6319	0.15371	*	0.9562	0.03902		0.8075	0.1027		0.8625	0.00065
SnRK2.8	1.0077	0.18441	0.993	0.0811		0.7989	0.02254		0.1805	0.03212	*	0.3136	0.00506	*
SnRK2.9	1.0457	0.10594	0.942829	0.04366		1.4517	0.20762		0.3616	0.01296	**	0.3997	0.03896	**
SnRK2.10	1.0029	0.00534	0.3682	0.17475	*	0.4412	0.08285	**	0.4924	0.1011	**	0.7397	0.08609	*
SnRK2.11	1.007	0.04072	1.4413	0.22864		3.2878	0.40919	**	7.4044	1.38477		7.2778	1.09024	**
SnRK2.12	1.008	0.01675	1.3608	0.35282		2.1418	0.34153	*	1.9773	0.28364	*	5.0468	0.77973	**
T4	CK	SE	3H	SE		6H	SE		12H	SE		24H	SE
SnRK2.1	1.0414	0.03697	2.2111	0.29627	**	3.6646	0.29077	*	0.5216	0.11198	**	0.3594	0.08693
SnRK2.2	1.0122	0.06982	0.4014	0.00197	**	0.3073	0.02872	**	0.1265	0.00695	**	0.1584	0.01529	**
SnRK2.3	1.0061	0.05296	1.5027	0.14677	*	1.4487	0.09677		0.8062	0.08379		0.5545	0.0252	**
SnRK2.4	1.0148	0.05136	1.1076	0.02682	*	1.2805	0.03237	*	1.3865	0.07101	**	4.3423	0.03059	**
SnRK2.5	1.0545	0.18089	1.1652	0.0544		1.6909	0.02138		1.3043	0.02945	*	1.4411	0.04706	*
SnRK2.6	1.021	0.03873	0.4541	0.09815		0.6702	0.07437		0.5025	0.03112		0.7495	0.04485	**
SnRK2.7	1.0332	0.0994	1.454	0.109	**	0.9795	0.06988	*	0.9259	0.03006		0.7113	0.02643	**
SnRK2.8	1.0077	0.18441	1.241	0.05027		0.9969	0.05558		0.157	0.01011		0.1566	0.00713
SnRK2.9	1.0457	0.10594	1.11121	0.0544		1.1252	0.02138		0.3763	0.02945		0.344	0.02353
SnRK2.10	1.0029	0.00534	0.5245	0.01202		0.6768	0.07873	*	1.1013	0.03729		0.4744	0.12428	*
SnRK2.11	1.007	0.05052	2.2359	0.18981	**	1.4429	0.84086		15.7399	0.99264	**	3.7162	0.39767	**
SnRK2.12	1.008	0.02902	1.1804	0.27017	**	1.6752	0.06289	**	1.5153	0.0433	**	9.6693	0.40513	**
